# Supplementary material for: Biodiversity Assessment of a Mississippi River Backwater Complex Using eDNA Metabarcoding
Source: Preprints.org preprint supplement (doi:10.20944/preprints202407.1862.v1), 2024-07-24
Supplement: Supplementary file 1 [file supplementary]

## Sheet: Table 1
Table 1: Characteristics and approximate maximum dimensions for floodplain habitats sampled for an analysis of fish communities using eDNA in southeastern Missouri.
		Length	Width	Spring Depth (m)		Fall Depth (m)
Habitat Complex	Sites	(km)	(m)	mean	max	mean	max	Habitats
Wolf Bayou Complex-oxbow lake bayou complex	Wolf Bayou	1.9	100	2.5	7.9	2	6.7	Steep banks, little vegetation, submerged structure extensive in places, canopy cover limited along shorelines.
	Hosner Bayou	0.9	50	1.5	3.3	1.2	2.4
	Samples Bayou	0.7	50	1.7	4.3	1	2.1
Robinson Bayou- expanse of low relief floodplain	Robinson Lake	2	200	0.6	1.2	0.3	0.5	Shallow banks, extensive flooding into vegetated habitat (in spring), very little submerged structure, canopy cover extensive within flooded vegetation (in spring).
Black Island margin- slough and ditch complex	Ditch	>5	10	0.9	1.7	dry	dry	Steep banks, vegetation along shoreline, no submerged structure, canopy cover extensive along slough but absent along ditch.
	Slough	5	30	0.8	1.4	0.5	0.6

## Sheet: Table 2
Table 2. List of species detected among Black Island backwater habitats with a heat map indicating the percent of combined samples that were positive for species presence for each habitat.
		Abundance	Dependence	Percent of total read count	Spring							Fall
Family	Species				Slough	Ditch	Robin-son Lake	Wolf Bayou	Hosner Bayou	Samples Bayou		Wolf Bayou	Hosner Bayou	Samples Bayou		MDC Surveys (years recorded)
Amiidae	Amia ocellicauda	U	B	0.0343283	1	1	1	1	0.75	1		0.833333	1	1		40;79;22
Anguillidae	Anguilla rostrata	U		4.36411e-05	0.333333	0	0	0	0	0		0	0	0
Aphredoderidae	Aphredoderus gibbosus	U	B	0.00130771	1	0.333333	1	0	0	0		0	0	0.5		40;79;22
Atherinopsidae	Labidesthes sicculus	U	F	0.00334286	0	0	0	0.833333	0.75	1		1	1	1		66;79;94
	Menidia beryllina	C	F	0.00143238	0.666667	0.666667	0.857143	0.166667	0	0		0.166667	0.5	0		78;22
Catostomidae	Carpiodes spp. (carpio, cyprinus)	A/U	F	0.000538149	1	1	0.428571	0.5	0.25	0.5		0.5	0.75	0.5		79
	Ictiobus spp. (bubalus, cyprinellus, niger)	A/C/U	B	0.103612	1	1	1	1	1	1		1	1	1		40;79
	Moxostoma macrolepidotum	U	F	0	0	0	0	0	0	0		0	0	0		79b
Centrarchidae	Centrarchus macropterus	P	B	0	0	0	0	0	0	0		0	0	0		40
	Lepomis cyanellus	U	B	0.0235204	0.666667	0.666667	1	1	1	1		1	1	1		66;22
	Lepomis gulosus	U	B	0.00894414	1	1	1	1	1	1		0.833333	0.75	1		40;66;22
	Lepomis humilis	U	B	0.0688648	1	1	1	1	1	1		1	1	1		79;94;22
	Lepomis macrochirus	C	B	0.122813	1	1	1	1	1	1		1	1	1		40;66;79;94;22
	Lepomis marginatus	P	B	0.0612773	1	1	1	1	1	1		1	1	1
	Lepomis megalotis	U	B	0.00431873	1	1	0.714286	1	1	1		0.833333	1	1		79;94;22
	Lepomis microlophus	U	B	2.57607e-05	0	0	0	0	0	0.25		0	0	0
	Lepomis miniatus	U	B	0.000102608	0	0	0.142857	0	0	0		0	0	0
	Lepomis symmetricus	U	B	0.000169782	0	0	0.857143	0.666667	0.25	0		0.166667	0	0
	Micropterus punctulatus	P	B	0.0024	0.333333	0.333333	0	1	0.75	1		1	0.5	1
	Micropterus nigricans	U	B	0.0071	1	1	0.857143	1	1	1		1	0.75	1		66;79;94
	Pomoxis annularis	C	B	0.00327737	1	1	1	0.833333	1	0.75		1	0.75	1		40;79;22
	Pomoxis nigromaculatus	U	B	0.00519726	1	1	1	0.833333	1	0.75		0.833333	0.75	0.75		40;22
Clupeidae	Alosa chrysochloris	C	F	5.0815e-05	0.666667	0	0	0.333333	0	0		0	0.25	0
	Dorosoma cepedianum	A	B	0.0437096	1	1	1	1	1	0.75		1	1	1		40;66;79
	Dorosoma petenense	U	B	0.00251808	0.666667	1	0.571429	0.666667	0	0		1	1	0.5
Esocidae	Esox americanus	P	B	0.0001	0	0	0.285714	0	0	0		0	0	0		79b
Fundulidae	Fundulus spp. (notatus, olivaceus)	P	B	0.00869767	1	1	1	1	1	1		0.833333	1	1		66;79;94
Ictaluridae	Ameiurus spp. (melas, natalis)	U	B	0.000108858	0	0	0.571429	0	0	0		0	0	0		40;79;22
	Ictalurus punctatus	C		0.00214097	1	1	1	1	0.75	0.75		1	1	1		79b
	Noturus gyrinus	U	B	0.000164401	0	0	0.142857	0.5	0	0.5		0.5	0.25	0.5		66;79;94
	Pylodictis olivaris	A		0.00346759	1	1	0.285714	1	1	1		0.833333	1	1
Lepisosteidae	Atractosteus spatula	U	B	3.64129e-05	0	0	0	0.5	0	0		0.166667	0	0
	Lepisosteus oculatus	U	B	0.0149377	1	1	1	1	1	1		1	1	1		22
	Lepisosteus osseus	C	B	0.00146103	0.666667	1	0.571429	1	1	0.75		1	1	1
	Lepisosteus platostomus	C	B	0.0322138	1	1	1	1	1	1		1	1	1		40;79;22
Leuciscidae	Hybognathus hayia	U	B	0	0	0	0	0	0	0		0	0	0		79b
	Hybognathus nuchalis	C	F	2.44564e-06	0.333333	0	0	0	0	0		0	0	0
	Notemigonus crysoleucas	P	B	8.35322e-05	0	0	0.571429	0	0.25	0		0.333333	0.25	0		40;79;22
	Notropis atherinoides	A	F	1.9076e-05	0.333333	0	0.428571	0	0	0		0	0	0
	Opsopoeodus emiliae	P	B	0.00283107	1	0	0.857143	0.666667	1	0.75		0.833333	1	1		79
	Paranotropis shumardia	C	F	0	0	0	0	0	0	0		0	0	0		79
Moronidae	Morone chrysops	C	F	0.000693257	1	1	0.285714	0.166667	0.25	0		0.333333	0.5	0		79b
Percidae	Etheostoma asprigene	U	B	0.00676274	1	1	0.857143	0.833333	1	1		0.666667	0.75	1		66;79
	Etheostoma chlorosoma	P	B	0.00404857	1	0	0.857143	0.833333	0.75	0.75		0.666667	1	1		79
	Etheostoma gracile	U	F	9.48908e-05	0.333333	0	0.857143	0.333333	0	0		0.166667	0	0		66;22
	Percina caprodes	U		4.1902e-05	0	0.333333	0	0.5	0	0		0	0	0.25
	Percina shumardi	U	F	9.07604e-06	0.333333	0	0	0	0	0		0	0	0		79b
Poeciliidae	Gambusia affinis	U	B	0.015875	1	1	1	0.833333	0.5	0.25		0.333333	0.75	1		40;66;79;94;22
Polyodontidae	Polyodon spathula	C	F	0.000123912	0	0.333333	0.428571	0.666667	0	0		0.833333	0	0.25		79
Sciaenidae	Aplodinotus grunniens	A	F	0.00846512	1	1	1	1	1	1		1	1	1
Cyprinidae	Cyprinus carpio	I	B	0.0689131	1	1	1	1	1	1		1	1	1		40
Xenocyprididae	Ctenopharyngodon idella	I	F	0.0144522	1	1	1	1	1	1		1	1	1
	Hypophthalmichthys molitrix	I	F	0.0854061	1	1	1	1	1	1		1	1	1		22
	Hypophthalmichthys nobilis	I	F	0.206497	1	1	1	1	1	1		1	1	1
	Mylopharyngodon piceus	I		0.0235953	1	1	1	1	1	1		1	1	1
Abundance and habitat dependency classifications from Schramm et al. (2016): (A) abundant, (C) common, (U) uncommon, (P) periodic, associated with tributaries, (F) fulluvial-dependent, (B) backwater-dependent.
a Species absent from eDNA reference database
b MDC records represented by single specimens

## Sheet: Table 3
Table 3. PERMANOVA comparing habitats sampled during the spring.
Source	df	SS	MS	Pseudo-F	P(perm)	Unique perms
Habitat	5	2284.2	456.83	6.8944	0.0001	9897
Res	21	1391.5	66.261
Total	26	3675.7

## Sheet: Table 4
Table 4. Averaged environmental variables collected at each sample location for each habitat in spring and fall.
	Secchi (m)		Cond (µS/cm)		DO (mg/L)		Temp (°C)
Sites	Sp	Fa	Sp	Fa	Sp	Fa	Sp	Fa
Wolf Bayou	1.1	1	309	309	6.6	4.8	24	23
Hosner Bayou	0.7	0.7	261	310	8.4	6.9	27	23
Samples Bayou	1	0.8	281	300	7.5	5.5	26	20
Robinson Lake	0.5	0.1	465	339	5.5	5.9	28	15
Ditch	0.5	NA	406	NA	5.8	NA	24	NA
Slough	0.5	0.1	485	361	7.7	6.6	26	16

## Sheet: Table 5
Table 5. PERMANOVA comparing bayou habitats sampled during the spring and fall.
Source	df	SS	MS	Pseudo-F	P(perm)	Unique perms
Bayou	2	364.9	182.44	2.81	0.0025	9941
Season	1	146.1	146.07	2.25	0.055	9957
Bayou x Season	2	180.1	90.05	1.39	0.19	9940
Res	22	1429.5	64.98
Total	27	2119.6

## Sheet: Table 6
Table 6. Pair-wise PERMANOVA tests to determine which habitats are significantly different from one another. Hosner Bayou (HB), Samples Bayou (SB), Wolf Bayou (WB).
Groups	t	P(perm)	Unique perms	P(MC)
HB, SB	1.28	0.14	9954	0.17
HB, WB	1.73	0.013	9947	0.028
SB, WB	1.76	0.022	9959	0.028

## Sheet: Table S1
Table S1. Presence/Absence data for each combined sample location for spring and fall collections. Sample numbers correspnd the figure 1.
		Wolf Bayou														Hosner Bayou								Samples Bayou								Robinson Lake														Ditch
		1		2		3		4		5		6		7		1		2		3		4		1		2		3		4		1		2		3		4		5		6		7		1		2
Family	Species	S	F	S	F	S	¾	S	F	S	F	S	F	S	F	S	F	S	F	S	F	S	F	S	F	S	F	S	F	S	F	S	¾	S	¾	S	¾	S	¾	S	¾	S	F*	S	F*	S	¾	S	¾
Amiidae	Amia ocellicauda	1	1	1	1	1	¾	1	1	1	1	1	0	1	1	1	1	1	1	1	1	0	1	1	1	1	1	1	1	1	1	1	¾	1	¾	1	¾	1	¾	1	¾	1	1	1	1	1	¾	1	¾
Anguillidae	Anguilla rostrata	0	0	0	0	0	¾	0	0	0	0	0	0	0	0	0	0	0	0	0	0	0	0	0	0	0	0	0	0	0	0	0	¾	0	¾	0	¾	0	¾	0	¾	0	0	0	0	0	¾	0	¾
Aphredoderidae	Aphredoderus gibbosus	0	0	0	0	0	¾	0	0	0	0	0	0	0	0	0	0	0	0	0	0	0	0	0	1	0	0	0	0	0	1	1	¾	1	¾	1	¾	1	¾	1	¾	1	1	1	0	1	¾	0	¾
Atherinopsidae	Labidesthes sicculus	1	1	1	1	0	¾	0	1	1	1	1	1	1	1	1	1	1	1	1	1	0	1	1	1	1	1	1	1	1	1	0	¾	0	¾	0	¾	0	¾	0	¾	0	0	0	0	0	¾	0	¾
	Menidia beryllina	0	0	0	0	0	¾	0	1	0	0	1	0	0	0	0	1	0	1	0	0	0	0	0	0	0	0	0	0	0	0	0	¾	1	¾	1	¾	1	¾	1	¾	1	1	1	0	1	¾	1	¾
Catostomidae	Carpiodes spp. (carpio, cyprinus)	1	1	0	0	0	¾	1	1	0	0	1	1	0	0	0	1	0	1	1	0	0	1	1	0	0	1	0	1	1	0	0	¾	1	¾	0	¾	0	¾	1	¾	1	0	0	0	1	¾	1	¾
	Ictiobus spp. (bubalus, cyprinellus, niger)	1	1	1	1	1	¾	1	1	1	1	1	1	1	1	1	1	1	1	1	1	1	1	1	1	1	1	1	1	1	1	1	¾	1	¾	1	¾	1	¾	1	¾	1	1	1	1	1	¾	1	¾
Centrarchidae	Lepomis cyanellus	1	1	1	1	1	¾	1	1	1	1	1	1	1	1	1	1	1	1	1	1	1	1	1	1	1	1	1	1	1	1	1	¾	1	¾	1	¾	1	¾	1	¾	1	1	1	1	1	¾	1	¾
	Lepomis gulosus	1	1	1	1	1	¾	1	1	1	0	1	1	1	1	1	1	1	1	1	0	1	1	1	1	1	1	1	1	1	1	1	¾	1	¾	1	¾	1	¾	1	¾	1	1	1	1	1	¾	1	¾
	Lepomis humilis	1	1	1	1	1	¾	1	1	1	1	1	1	1	1	1	1	1	1	1	1	1	1	1	1	1	1	1	1	1	1	1	¾	1	¾	1	¾	1	¾	1	¾	1	1	1	1	1	¾	1	¾
	Lepomis macrochirus	1	1	1	1	1	¾	1	1	1	1	1	1	1	1	1	1	1	1	1	1	1	1	1	1	1	1	1	1	1	1	1	¾	1	¾	1	¾	1	¾	1	¾	1	1	1	1	1	¾	1	¾
	Lepomis marginatus	1	1	1	1	0	¾	1	1	1	1	1	1	1	1	1	1	1	1	1	1	1	1	1	1	1	1	1	1	1	1	1	¾	1	¾	1	¾	1	¾	1	¾	1	1	1	1	1	¾	1	¾
	Lepomis megalotis	1	1	1	1	0	¾	1	1	1	0	1	1	1	1	1	1	1	1	1	1	1	1	1	1	1	1	1	1	1	1	0	¾	1	¾	1	¾	0	¾	1	¾	1	1	1	1	1	¾	1	¾
	Lepomis microlophus	0	0	0	0	0	¾	0	0	0	0	0	0	0	0	0	0	0	0	0	0	0	0	0	0	0	0	0	0	1	0	0	¾	0	¾	0	¾	0	¾	0	¾	0	0	0	0	0	¾	0	¾
	Lepomis miniatus	0	0	0	0	0	¾	0	0	0	0	0	0	0	0	0	0	0	0	0	0	0	0	0	0	0	0	0	0	0	0	0	¾	1	¾	0	¾	0	¾	0	¾	0	1	0	0	0	¾	0	¾
	Lepomis symmetricus	1	1	1	0	0	¾	0	0	0	0	1	0	1	0	0	0	1	0	0	0	0	0	0	0	0	0	0	0	0	0	1	¾	0	¾	1	¾	1	¾	1	¾	1	0	1	0	0	¾	0	¾
	Micropterus punctulatus	1	1	1	1	0	¾	1	1	1	1	1	1	1	1	1	1	1	1	1	0	0	0	1	1	1	1	1	1	1	1	0	¾	0	¾	0	¾	0	¾	0	¾	0	0	0	0	1	¾	0	¾
	Micropterus nigricans	1	1	1	1	0	¾	1	1	1	1	1	1	1	1	1	1	1	1	1	0	1	1	1	1	1	1	1	1	1	1	0	¾	1	¾	1	¾	1	¾	1	¾	1	0	1	0	1		1
	Pomoxis annularis	1	1	1	1	1	¾	1	1	1	1	0	1	1	1	1	1	1	1	1	0	1	1	0	1	1	1	1	1	1	1	1	¾	1	¾	1	¾	1	¾	1	¾	1	1	1	1	1	¾	1	¾
	Pomoxis nigromaculatus	1	1	1	1	1	¾	1	1	0	1	1	0	1	1	1	1	1	0	1	1	1	1	1	1	1	1	0	0	1	1	1	¾	1	¾	1	¾	1	¾	1	¾	1	1	1	1	1	¾	1	¾
Clupeidae	Alosa chrysochloris	0	0	1	0	0	¾	1	0	0	0	0	0	0	0	0	0	0	1	0	0	0	0	0	0	0	0	0	0	0	0	0	¾	0	¾	0	¾	0	¾	0	¾	0	0	0	0	0	¾	0	¾
	Dorosoma cepedianum	1	1	1	1	1	¾	1	1	1	1	1	1	1	1	1	1	1	1	1	1	1	1	1	1	1	1	0	1	1	1	1	¾	1	¾	1	¾	1	¾	1	¾	1	1	1	1	1	¾	1	¾
	Dorosoma petenense	1	1	1	1	0	¾	0	1	1	1	1	1	0	1	0	1	0	1	0	1	0	1	0	0	0	1	0	0	0	1	0	¾	0	¾	0	¾	1	¾	1	¾	1	0	1	0	1	¾	1	¾
Esocidae	Esox americanus	0	0	0	0	0	¾	0	0	0	0	0	0	0	0	0	0	0	0	0	0	0	0	0	0	0	0	0	0	0	0	0	¾	1	¾	1	¾	0	¾	0	¾	0	0	0	0	0	¾	0	¾
Fundulidae	Fundulus spp. (notatus, olivaceus)	1	1	1	1	0	¾	1	1	1	0	1	1	1	1	1	1	1	1	1	1	1	1	1	1	1	1	1	1	1	1	1	¾	1	¾	1	¾	1	¾	1	¾	1	1	1	1	1	¾	1	¾
Ictaluridae	Ameiurus spp. (melas, natalis)	0	0	0	0	0	¾	0	0	0	0	0	0	0	0	0	0	0	0	0	0	0	0	0	0	0	0	0	0	0	0	0	¾	1	¾	1	¾	0	¾	1	¾	1	1	0	1	0	¾	0	¾
	Ictalurus punctatus	1	1	1	1	0	¾	1	1	1	1	1	1	1	1	1	1	1	1	1	1	0	1	1	1	0	1	1	1	1	1	1	¾	1	¾	1	¾	1	¾	1	¾	1	1	1	1	1	¾	1	¾
	Noturus gyrinus	1	1	0	0	0	¾	1	1	0	0	0	0	1	1	0	1	0	0	0	0	0	0	1	1	0	0	0	0	1	1	0	¾	0	¾	0	¾	0	¾	0	¾	1	0	0	0	0	¾	0	¾
	Pylodictis olivaris	1	1	1	1	0	¾	1	1	1	1	1	0	1	1	1	1	1	1	1	1	1	1	1	1	1	1	1	1	1	1	0	¾	0	¾	0	¾	0	¾	1	¾	1	0	0	1	1	¾	1	¾
Lepisosteidae	Atractosteus spatula	1	1	0	0	0	¾	1	0	1	0	0	0	0	0	0	0	0	0	0	0	0	0	0	0	0	0	0	0	0	0	0	¾	0	¾	0	¾	0	¾	0	¾	0	0	0	0	0	¾	0	¾
	Lepisosteus oculatus	1	1	1	1	1	¾	1	1	1	1	1	1	1	1	1	1	1	1	1	1	1	1	1	1	1	1	1	1	1	1	1	¾	1	¾	1	¾	1	¾	1	¾	1	1	1	1	1	¾	1	¾
	Lepisosteus osseus	1	1	1	1	1	¾	1	1	1	1	1	1	1	1	1	1	1	1	1	1	1	1	0	1	1	1	1	1	1	1	1	¾	1	¾	1	¾	0	¾	0	¾	1	1	0	1	1	¾	1	¾
	Lepisosteus platostomus	1	1	1	1	1	¾	1	1	1	1	1	1	1	1	1	1	1	1	1	1	1	1	1	1	1	1	1	1	1	1	1	¾	1	¾	1	¾	1	¾	1	¾	1	1	1	1	1	¾	1	¾
Leuciscidae	Hybognathus nuchalis	0	0	0	0	0	¾	0	0	0	0	0	0	0	0	0	0	0	0	0	0	0	0	0	0	0	0	0	0	0	0	0	¾	0	¾	0	¾	0	¾	0	¾	0	0	0	0	0	¾	0	¾
	Notemigonus crysoleucas	0	0	0	0	0	¾	0	0	0	0	0	1	0	1	1	1	0	0	0	0	0	0	0	0	0	0	0	0	0	0	0	¾	1	¾	1	¾	1	¾	0	¾	1	0	0	0	0	¾	0	¾
	Notropis atherinoides	0	0	0	0	0	¾	0	0	0	0	0	0	0	0	0	0	0	0	0	0	0	0	0	0	0	0	0	0	0	0	0	¾	1	¾	0	¾	0	¾	1	¾	0	0	1	0	0	¾	0	¾
	Opsopoeodus emiliae	1	1	0	1	1	¾	1	1	0	0	1	1	1	1	1	1	1	1	1	1	1	1	1	1	0	1	1	1	1	1	0	¾	1	¾	1	¾	1	¾	1	¾	1	1	1	0	0	¾	0	¾
Moronidae	Morone chrysops	0	1	0	0	0	¾	1	1	0	0	0	0	0	0	0	0	0	1	1	0	0	1	0	0	0	0	0	0	0	0	0	¾	0	¾	0	¾	1	¾	1	¾	0	0	0	0	1	¾	1	¾
Percidae	Etheostoma asprigene	1	1	0	1	1	¾	1	1	1	0	1	0	1	1	1	1	1	1	1	0	1	1	1	1	1	1	1	1	1	1	1	¾	1	¾	1	¾	1	¾	0	¾	1	0	1	0	1	¾	1	¾
	Etheostoma chlorosoma	1	1	0	1	1	¾	1	1	1	0	1	0	1	1	1	1	1	1	0	1	1	1	1	1	0	1	1	1	1	1	0	¾	1	¾	1	¾	1	¾	1	¾	1	0	1	0	0	¾	0	¾
	Etheostoma gracile	1	1	0	0	1	¾	1	0	0	0	0	0	0	0	0	0	0	0	0	0	0	0	0	0	0	0	0	0	0	0	1	¾	1	¾	1	¾	0	¾	1	¾	1	1	1	0	0	¾	0	¾
	Percina caprodes	1	0	0	0	0	¾	0	0	0	0	1	0	1	0	0	0	0	0	0	0	0	0	0	1	0	0	0	0	0	0	0	¾	0	¾	0	¾	0	¾	0	¾	0	0	0	0	1	¾	0	¾
	Percina shumardi	0	0	0	0	0	¾	0	0	0	0	0	0	0	0	0	0	0	0	0	0	0	0	0	0	0	0	0	0	0	0	0	¾	0	¾	0	¾	0	¾	0	¾	0	0	0	0	0	¾	0	¾
Poeciliidae	Gambusia affinis	1	1	1	0	1	¾	1	1	1	0	1	0	0	0	0	1	1	1	1	0	0	1	0	1	0	1	0	1	1	1	1	¾	1	¾	1	¾	1	¾	1	¾	1	1	1	1	1	¾	1	¾
Polyodontidae	Polyodon spathula	0	1	1	0	0	¾	0	1	1	1	1	1	1	1	0	0	0	0	0	0	0	0	0	0	0	0	0	0	0	1	0	¾	1	¾	0	¾	0	¾	1	¾	1	0	0	0	1	¾	0	¾
Sciaenidae	Aplodinotus grunniens	1	1	1	1	1	¾	1	1	1	1	1	1	1	1	1	1	1	1	1	1	1	1	1	1	1	1	1	1	1	1	1	¾	1	¾	1	¾	1	¾	1	¾	1	1	1	1	1	¾	1	¾
Cyprinidae	Cyprinus carpio	1	1	1	1	1	¾	1	1	1	1	1	1	1	1	1	1	1	1	1	1	1	1	1	1	1	1	1	1	1	1	1	¾	1	¾	1	¾	1	¾	1	¾	1	1	1	1	1	¾	1	¾
Xenocyprididae	Ctenopharyngodon idella	1	1	1	1	0	¾	1	1	1	1	1	1	1	1	1	1	1	1	1	1	1	1	1	1	1	1	1	1	1	1	1	¾	1	¾	1	¾	1	¾	1	¾	1	1	1	1	1	¾	1	¾
	Hypophthalmichthys molitrix	1	1	1	1	0	¾	1	1	1	1	1	1	1	1	1	1	1	1	1	1	1	1	1	1	1	1	1	1	1	1	1	¾	1	¾	1	¾	1	¾	1	¾	1	1	1	1	1	¾	1	¾
	Hypophthalmichthys nobilis	1	1	1	1	1	¾	1	1	1	1	1	1	1	1	1	1	1	1	1	1	1	1	1	1	1	1	1	1	1	1	1	¾	1	¾	1	¾	1	¾	1	¾	1	1	1	1	1	¾	1	¾
	Mylopharyngodon piceus	1	1	1	1	0	¾	1	1	1	1	1	1	1	1	1	1	1	1	1	1	1	1	1	1	1	1	1	1	1	1	1	¾	1	¾	1	¾	1	¾	1	¾	1	1	1	1	1	¾	1	¾
S spring collection date
F fall collection date
1 presence
0 absence
¾ sites were not sampled in the fall because they were dry.
* samples exhibited high suspended sediment loads, and we were only able to filter 15-20 ml of water.
[truncated: 8 more columns]

## Sheet: Table S2
Table S2. Pair-wise PERMANOVA tests to determine which habitats are significantly different from one another.
Groups	t	P(perm)	Unique perms	P(MC)
D, HB	3.05	0.052	35	0.0092
D, RL	2.58	0.0067	120	0.005
D, SB	3.24	0.027	35	0.0048
D, S	1.92	0.096	10	0.046
D, WB	2.27	0.011	84	0.012
HB, RL	2.99	0.0034	330	0.001
HB, SB	0.81	0.86	35	0.61
HB, S	2.7	0.032	35	0.0084
HB, WB	1.72	0.017	210	0.049
RL, SB	3.68	0.0036	330	0.0002
RL, S	1.88	0.0087	120	0.028
RL, WB	3.1	0.0005	1711	0.0002
SB, S	3.15	0.028	35	0.0051
SB, WB	1.72	0.026	210	0.049
S, WB	2.6	0.011	84	0.0062

## Sheet: Table S3
Table S3. Spearman rank correlations of individual species that show the strongest correlation with ovrall spring assemblage structure, calculated using BIOENV.
Species	Corr.
Labidesthes sicculus	0.629
Micropterus punctulatus	0.603
Pylodictis olivaris	0.45
Aphredoderus gibbosus	0.441
Morone chrysops	0.409
Menidia beryllina	0.402
Ameiurus spp. (melas, natalis)	0.376
Carpiodes spp. (carpio, cyprinus)	0.302
